# Supplementary material
Source: publisher site journal article supplement (https://www.dovepress.com/article/316262)
Supplement: Supplementary file 1 [file get_supplementary_file.php]

**The association between inflammatory and oxidative stress biomarkers and plasma metabolites in an occupational longitudinal analysis in healthy male workers**

**Supplementary Materials**

## Supplementary Table 1. The profile of urinary and plasma inflammatory biomarkers repeated measurements (529 observations).

|  | Min | 25th | Median | Mean | 75th | Max | N_missing |
| --- | --- | --- | --- | --- | --- | --- | --- |
| U-8-OHdG (ng/mg-creatinine) | 4.5 | 17.4 | 23.5 | 24.1 | 29.6 | 63.5 | 81 |
| U-8-isoprostane (pg/mg-creatinine) | 346.4 | 1069.1 | 1639.7 | 1892.5 | 2380.8 | 10028.0 | 63 |
| Plasma C-Reactive Protein (CRP) Conc. (ng/mL) | 0.6 | 846.1 | 2034.8 | 4083.3 | 5282.7 | 67438.3 | 2 |
| Plasma Serum Amyloid A (SAA) Conc. (ng/mL) | 1.1 | 1472.3 | 2700.3 | 5648.0 | 5299.6 | 101898.3 | 2 |
| Plasma sICAM-1 Conc. (ng/mL) | 0.2 | 268.4 | 322.6 | 338.3 | 406.7 | 1287.8 | 2 |
| Plasma sVCAM-1 Conc. (ng/mL) | 0.3 | 411.7 | 521.0 | 530.5 | 629.0 | 1516.2 | 2 |
| Plasma Interleukin-1 (IL-1β) Conc. (pg/mL) | 0.0 | 0.0 | 0.5 | 2.9 | 1.6 | 293.0 | 2 |
| Plasma Interleukin-2 (IL-2) Conc. (pg/mL) | 0.0 | 0.9 | 1.9 | 3.0 | 3.2 | 132.4 | 2 |
| Plasma Interleukin-6 (IL-6) Conc. (pg/mL) | 2.8 | 14.0 | 22.4 | 66.8 | 34.2 | 7021.3 | 2 |
| Plasma Interleukin-8 (IL-8) Conc. (pg/mL) | 1.7 | 11.4 | 15.6 | 18.9 | 20.4 | 175.9 | 2 |
| Plasma Interleukin-10 (IL-10) Conc. (pg/mL) | 0.6 | 4.4 | 6.0 | 8.9 | 9.4 | 114.6 | 2 |
| Plasma TNF-α (pg/mL) | 1.5 | 8.1 | 10.7 | 27.9 | 13.8 | 2882.2 | 2 |
| Plasma VEGF Conc. (pg/mL) | 39.3 | 213.9 | 316.7 | 360.4 | 434.6 | 1417.5 | 2 |

## Supplementary Table 2. The profile of metabolites that changed over time in participants who provided more than 10 repeated samplesa,b.

| Model | Metabolites |  | P-value |
| --- | --- | --- | --- |
| model1 | 3beta-hydroxy-5-cholestenoate | -4.67E-04 | 1.12E-05 |
| model2 | 3beta-hydroxy-5-cholestenoate | -4.71E-04 | 6.65E-06 |
| model3 | 3beta-hydroxy-5-cholestenoate | -4.36E-04 | 3.50E-05 |
| model1 | 3-hydroxyhippurate | 2.02E-03 | 8.86E-05 |
| model2 | 3-hydroxyhippurate | 2.02E-03 | 6.80E-05 |
| model2 | 4-cholesten-3-one | -5.74E-04 | 5.10E-05 |
| model3 | 4-cholesten-3-one | -6.06E-04 | 1.80E-05 |
| model1 | 4-cholesten-3-one | -6.04E-04 | 2.54E-05 |
| model2 | androstenediol (3beta,17beta) monosulfate (2) | 4.79E-04 | 2.39E-05 |
| model3 | androstenediol (3beta,17beta) monosulfate (2) | 4.96E-04 | 1.08E-05 |
| model1 | androstenediol (3beta,17beta) monosulfate (2) | 4.76E-04 | 3.60E-05 |
| model1 | biliverdin | -6.66E-04 | 1.10E-05 |
| model2 | biliverdin | -6.74E-04 | 6.42E-06 |
| model3 | ectoine | 1.98E-03 | 3.69E-05 |
| model1 | ectoine | 2.24E-03 | 3.24E-06 |
| model2 | ectoine | 2.19E-03 | 3.53E-06 |
| model2 | glycerophosphoethanolamine | 1.18E-03 | 7.35E-05 |
| model1 | hypoxanthine | -1.16E-03 | 4.08E-06 |
| model2 | hypoxanthine | -1.06E-03 | 2.43E-05 |
| model1 | linoleoylcarnitine (C18:2)* | -5.32E-04 | 3.67E-05 |
| model2 | linoleoylcarnitine (C18:2)* | -5.35E-04 | 2.48E-05 |
| model1 | N-acetylglutamate | 9.77E-04 | 3.13E-06 |
| model2 | N-acetylglutamate | 9.89E-04 | 1.64E-06 |
| model1 | oleoyl ethanolamide | -8.28E-04 | 2.22E-05 |
| model2 | oleoyl ethanolamide | -7.92E-04 | 3.81E-05 |
| model2 | oleoylcarnitine (C18:1) | -5.17E-04 | 9.96E-05 |
| model2 | palmitoyl-arachidonoyl-glycerol (16:0/20:4) [2]* | 2.01E-03 | 1.29E-05 |
| model1 | palmitoyl-arachidonoyl-glycerol (16:0/20:4) [2]* | 2.02E-03 | 1.71E-05 |
| model1 | 1-myristoylglycerol (14:0) | 1.61E-03 | 2.55E-05 |
| model2 | 1-myristoylglycerol (14:0) | 1.66E-03 | 1.16E-05 |
| model2 | sphingomyelin (d18:1/20:2, d18:2/20:1, d16:1/22:2)* | -4.51E-04 | 1.23E-05 |
| model1 | sphingomyelin (d18:1/20:2, d18:2/20:1, d16:1/22:2)* | -4.63E-04 | 1.02E-05 |
| model3 | sphingomyelin (d18:1/20:2, d18:2/20:1, d16:1/22:2)* | -4.29E-04 | 3.55E-05 |
| model2 | sphingomyelin (d18:2/18:1)* | -4.54E-04 | 2.85E-10 |
| model3 | sphingomyelin (d18:2/18:1)* | -4.39E-04 | 1.04E-09 |
| model1 | sphingomyelin (d18:2/18:1)* | -4.62E-04 | 2.64E-10 |
| model2 | tartronate (hydroxymalonate) | -1.08E-03 | 8.62E-05 |
| model3 | tartronate (hydroxymalonate) | -1.09E-03 | 6.49E-05 |
| model1 | tartronate (hydroxymalonate) | -1.09E-03 | 9.65E-05 |
| model3 | thymol sulfate | 3.23E-03 | 1.22E-07 |
| model2 | thymol sulfate | 3.32E-03 | 7.66E-08 |
| model1 | thymol sulfate | 3.20E-03 | 2.90E-07 |

a The linear mixed-effect models are given by

where denotes the metabolite measurement for participant *i* at the jth day since 1/29/2010 (the first day of the study) , denotes the number of days since 1/29/2010, and denotes the vector covariates (Model 1: age, BMI, race, smoking status, weld day/non-weld day, AM/PM, and the interaction between weld day/non-weld day and AM/PM; Model 2: age, BMI, race, smoking status, weld day/non-weld day, AM/PM; Model 3: age, BMI, race, smoking status). The random intercepts are independently distributed , and the residuals , where denotes the normal distribution.

b the coefficient for time (days) were reported for associations which p values was lower than 0.0001.

The

## Supplementary Table 3. The profile of inflammation biomarker that changed over time in participants who provided more than 10 repeated samplesa,b.

|  | Model1 |  | Model2 |  | Model3 |  |
| --- | --- | --- | --- | --- | --- | --- |
| Metabolites |  | P-value |  | P-value |  | P-value |
| Urinary 8-OHdG | 6.14E-04 | 5.42E-02 | 6.20E-04 | 4.61E-02 | 6.00E-04 | 5.51E-02 |
| Plasma interleukin-6 (IL-6), pg/mL | 7.15E-04 | 6.13E-04 | 7.69E-04 | 2.06E-04 | 7.25E-04 | 4.13E-04 |
| Plasma interleukin-10 (IL-10), pg/mL | 3.62E-04 | 2.41E-02 | 3.78E-04 | 1.70E-02 | 3.71E-04 | 1.77E-02 |
| Plasma TNF-a, pg/mL | 6.29E-04 | 7.97E-05 | 6.44E-04 | 4.30E-05 | 6.86E-04 | 1.37E-05 |
| Plasma VEGF, pg/mL | 3.30E-04 | 4.68E-02 | 3.33E-04 | 4.17E-02 | 3.22E-04 | 4.66E-02 |

a The linear mixed-effect models are given by

where denotes the metabolite measurement for participant *i* at the jth day since 1/29/2010 (the first day of the study) , denotes the number of days since 1/29/2010, and denotes the vector covariates (Model 1: age, BMI, race, smoking status, weld day/non-weld day, AM/PM, and the interaction between weld day/non-weld day and AM/PM; Model 2: age, BMI, race, smoking status, weld day/non-weld day, AM/PM; Model 3: age, BMI, race, smoking status). The random intercepts are independently distributed , and the residuals , where denotes the normal distribution.

b the coefficient for time (days) were reported for associations which p values was lower than 0.05.

## Supplementary Figure 1. The profile of plasma 3beta-hydroxy-5-cholestenoate (normalized) repeated measurements of participants who provided more than 10 samples.


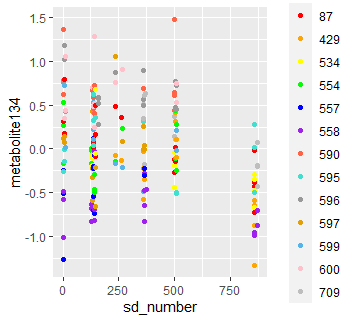


Number of days since 1/29/2010 ID

## Supplementary Figure 2. The profile of plasma 3-hydroxyhippurate (normalized) repeated measurements of participants who provided more than 10 samples.


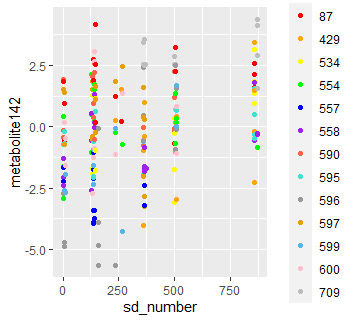


Number of days since 1/29/2010 ID

## Supplementary Figure 3. The profile of plasma 4-cholesten-3-one (normalized) repeated measurements of participants who provided more than 10 samples.


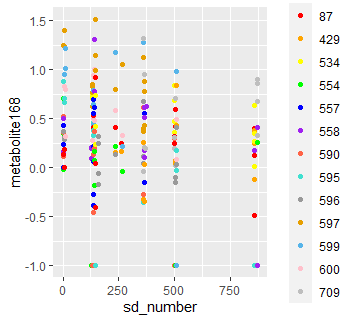


Number of days since 1/29/2010 ID

## Supplementary Figure 4. The profile of plasma androstenediol (3beta,17beta) monosulfate (2) (normalized) repeated measurements of participants who provided more than 10 samples.


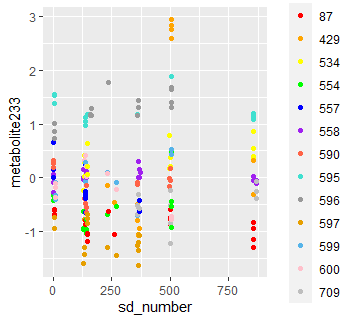


Number of days since 1/29/2010 ID

## Supplementary Figure 5. The profile of plasma biliverdin (normalized) repeated measurements of participants who provided more than 10 samples.


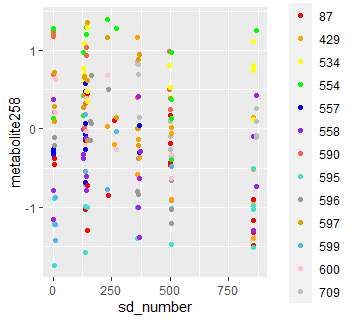


Number of days since 1/29/2010 ID

## Supplementary Figure 6. The profile of plasma ectoine (normalized) repeated measurements of participants who provided more than 10 samples.


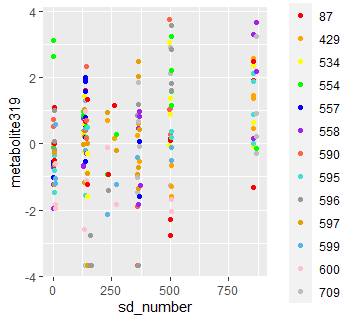


Number of days since 1/29/2010 ID

## Supplementary Figure 7. The profile of plasma glycerophosphoethanolamine (normalized) repeated measurements of participants who provided more than 10 samples.


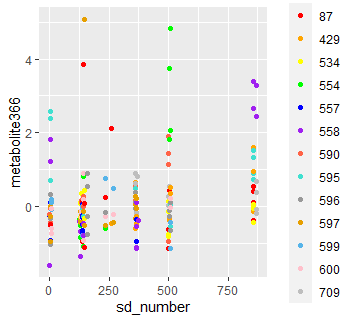


Number of days since 1/29/2010 ID

## Supplementary Figure 8. The profile of plasma hypoxanthine (normalized) repeated measurements of participants who provided more than 10 samples.


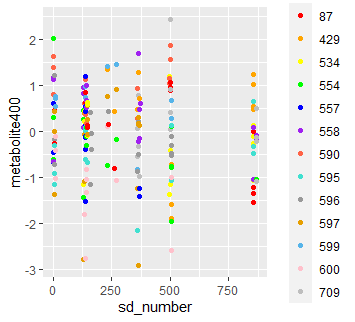


Number of days since 1/29/2010 ID

## Supplementary Figure 9. The profile of plasma linoleoylcarnitine (C18:2)* (normalized) repeated measurements of participants who provided more than 10 samples.


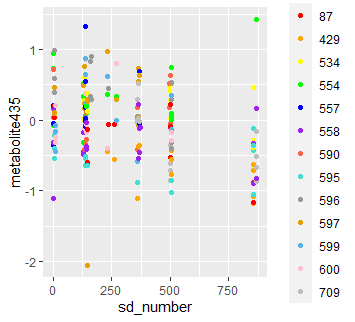


Number of days since 1/29/2010 ID

## Supplementary Figure 10. The profile of plasma N-acetylglutamate (normalized) repeated measurements of participants who provided more than 10 samples.


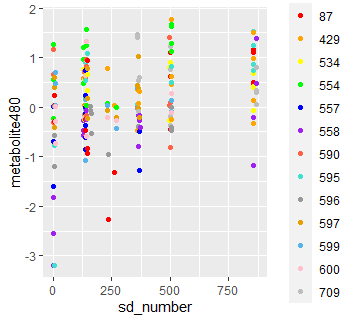


Number of days since 1/29/2010 ID

## Supplementary Figure 11. The profile of plasma oleoyl ethanolamide (normalized) repeated measurements of participants who provided more than 10 samples.


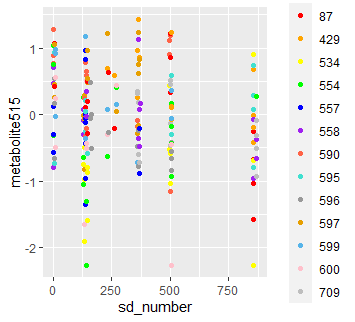


Number of days since 1/29/2010 ID

## Supplementary Figure 12. The profile of plasma oleoylcarnitine (C18:1) (normalized) repeated measurements of participants who provided more than 10 samples.


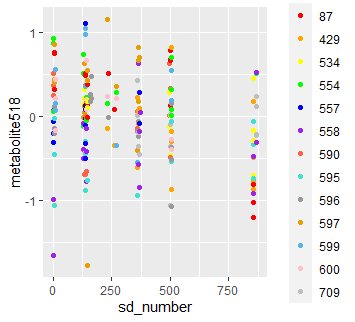


Number of days since 1/29/2010 ID

## Supplementary Figure 13. The profile of plasma oleoylcarnitine (C18:1) (normalized) repeated measurements of participants who provided more than 10 samples.


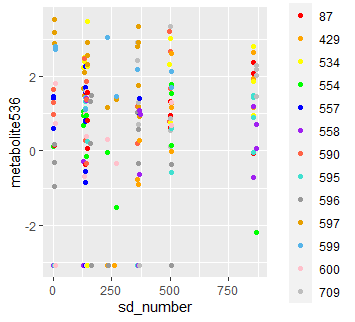


Number of days since 1/29/2010 ID

## Supplementary Figure 14. The profile of plasma 1-myristoylglycerol (14:0) (normalized) repeated measurements of participants who provided more than 10 samples.


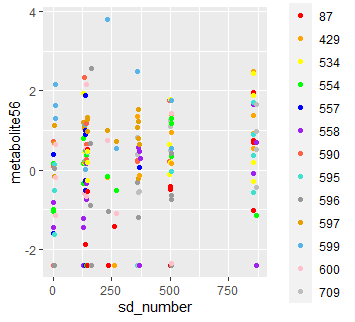


Number of days since 1/29/2010 ID

## Supplementary Figure 15. The profile of plasma sphingomyelin (d18:1/20:2, d18:2/20:1, d16:1/22:2)* (normalized) repeated measurements of participants who provided more than 10 samples.


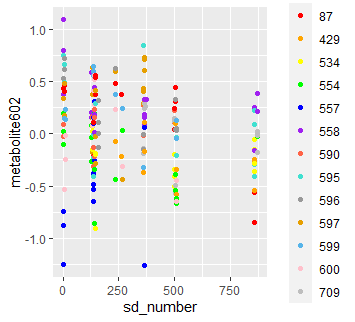


Number of days since 1/29/2010 ID

## Supplementary Figure 16. The profile of plasma sphingomyelin (d18:2/18:1)* (normalized) repeated measurements of participants who provided more than 10 samples.


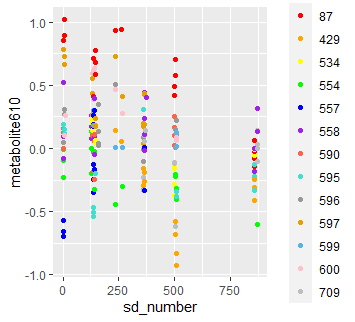


Number of days since 1/29/2010 ID

## Supplementary Figure 17. The profile of plasma tartronate (hydroxymalonate) (normalized) repeated measurements of participants who provided more than 10 samples.


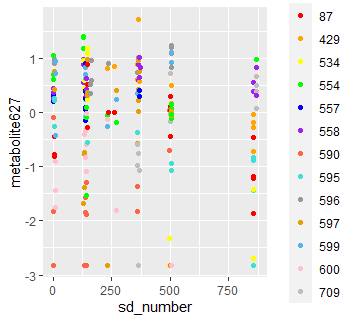


Number of days since 1/29/2010 ID

## Supplementary Figure 18. The profile of plasma thymol sulfate (normalized) repeated measurements of participants who provided more than 10 samples.


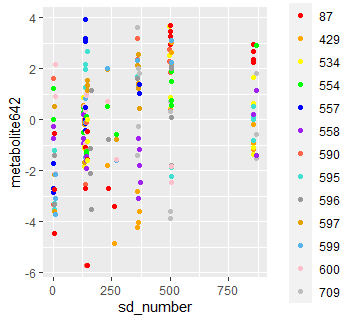


Number of days since 1/29/2010 ID

## Supplementary Figure 19. The profile of urinary 8-OHdG (ng/mg creatinine) repeated measurements of participants who provided more than 10 samples.


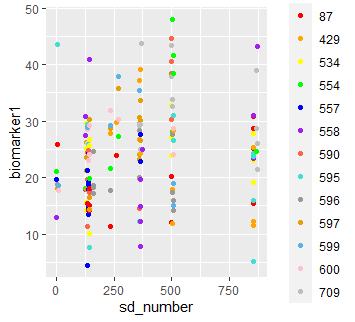


Number of days since 1/29/2010 ID

## Supplementary Figure 20. The profile of urinary 8-isoprostane (pg/mg creatinine) repeated measurements of participants who provided more than 10 samples.


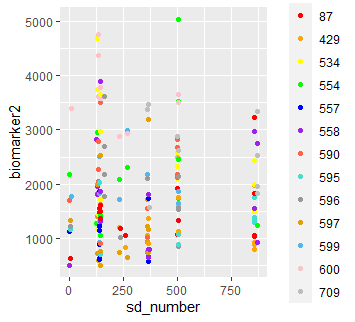


Number of days since 1/29/2010 ID

## Supplementary Figure 21. The profile of plasma C-reactive protein (ng/mL) repeated measurements of participants who provided more than 10 samples.


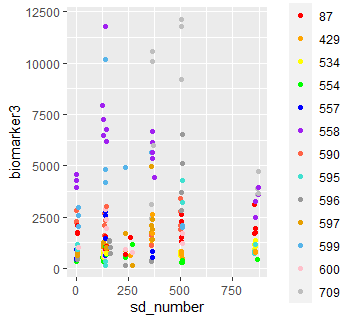


Number of days since 1/29/2010 ID

## Supplementary Figure 22. The profile of plasma serum amyloid A (ng/mL) repeated measurements of participants who provided more than 10 samples.


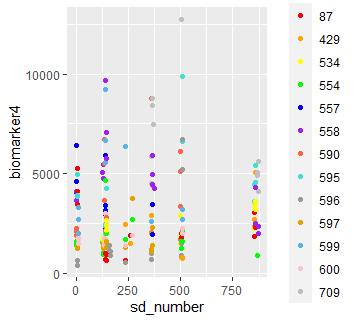


Number of days since 1/29/2010 ID

## Supplementary Figure 23. The profile of plasma sICAM-1 (ng/mL) repeated measurements of participants who provided more than 10 samples.


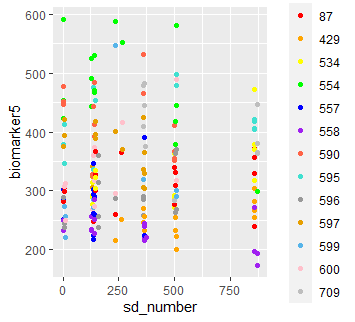


Number of days since 1/29/2010 ID

## Supplementary Figure 24. The profile of plasma sVCAM-1 (ng/mL) repeated measurements of participants who provided more than 10 samples.


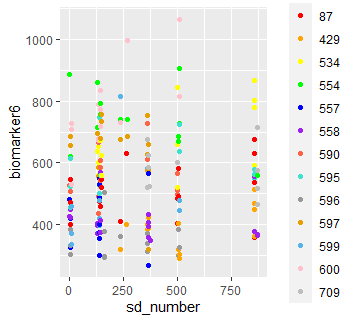


Number of days since 1/29/2010 ID

## Supplementary Figure 25. The profile of plasma interleukin-1 (pg/mL) repeated measurements of participants who provided more than 10 samples.


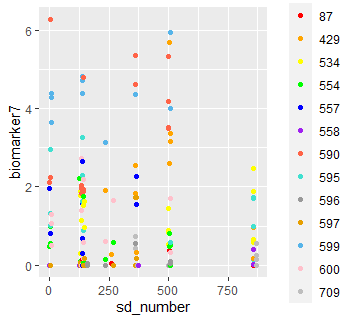


Number of days since 1/29/2010 ID

## Supplementary Figure 26. The profile of plasma interleukin-2 (pg/mL) repeated measurements of participants who provided more than 10 samples.


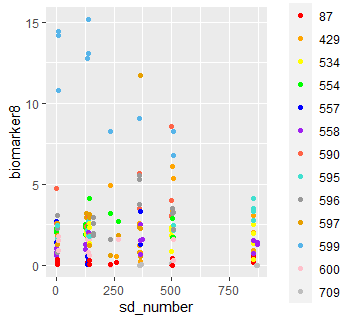


Number of days since 1/29/2010 ID

## Supplementary Figure 27. The profile of plasma interleukin-6 (pg/mL) repeated measurements of participants who provided more than 10 samples.


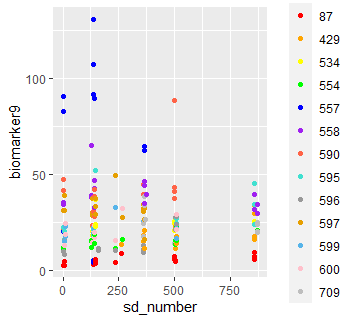


Number of days since 1/29/2010 ID

## Supplementary Figure 28. The profile of plasma interleukin-8 (pg/mL) repeated measurements of participants who provided more than 10 samples.


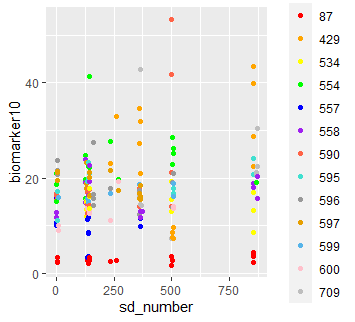


Number of days since 1/29/2010 ID

## Supplementary Figure 29. The profile of plasma interleukin-10 (pg/mL) repeated measurements of participants who provided more than 10 samples.


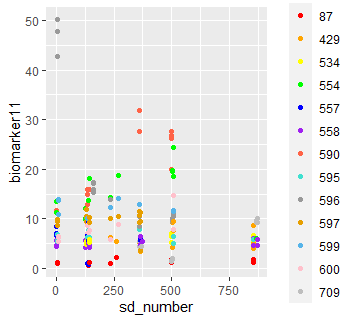


Number of days since 1/29/2010 ID

## Supplementary Figure 30. The profile of plasma TNF-a (pg/mL) repeated measurements of participants who provided more than 10 samples.


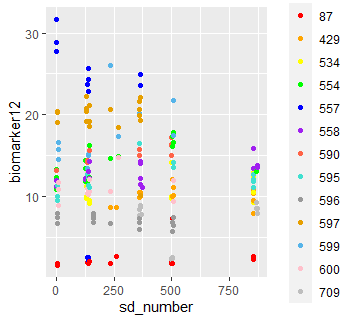


Number of days since 1/29/2010 ID

## Supplementary Figure 31. The profile of plasma VEGF (pg/mL) repeated measurements of participants who provided more than 10 samples.


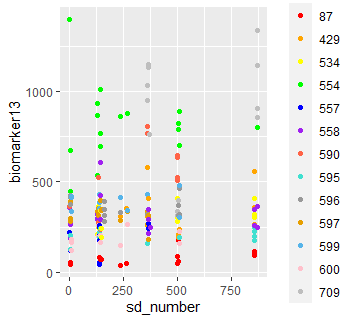


Number of days since 1/29/2010 ID
